# Supplementary material
Source: PubMed Central journal article supplement (PMC6715529)

Supplementary Figure 1. Uncropped scans with size marker indications

Figure 2a

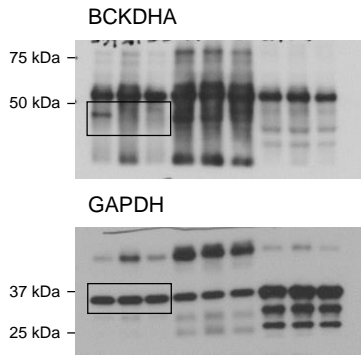

Figure 3c

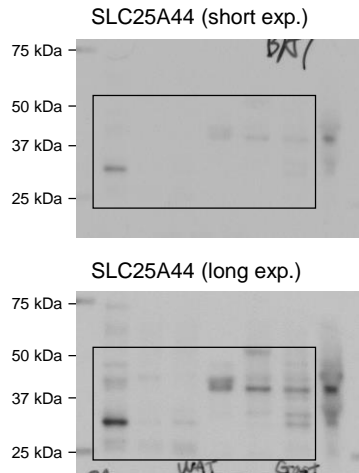

Figure 4b

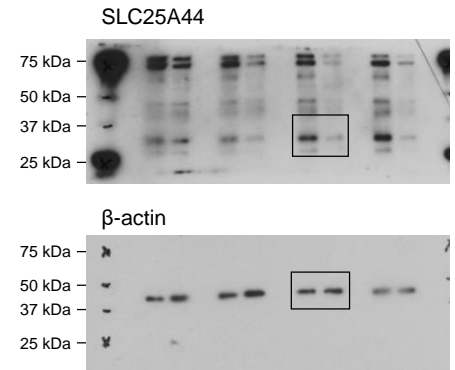

Ext Data Fig 2i

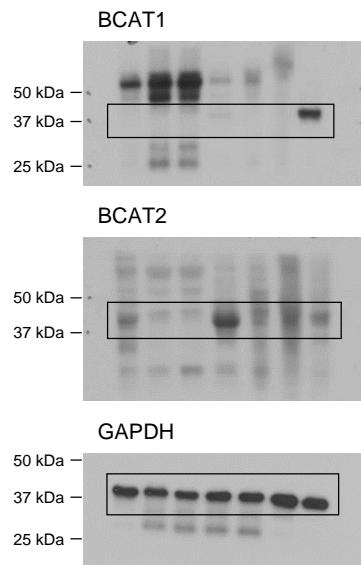

Ext Data Fig 5g

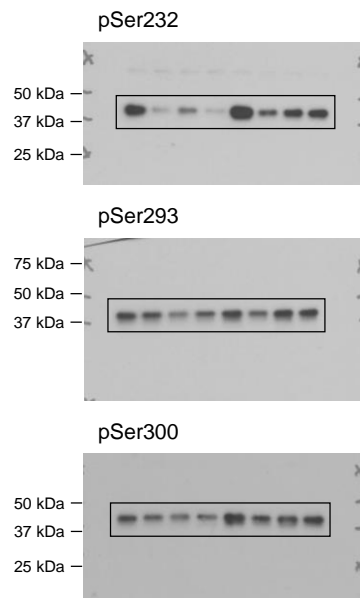

Ext Data Fig 6c

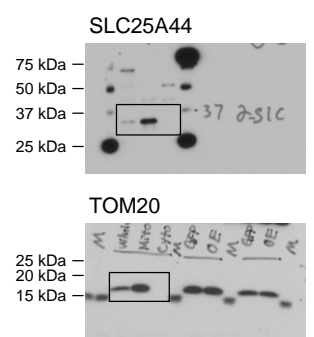

Ext Data Fig 6d

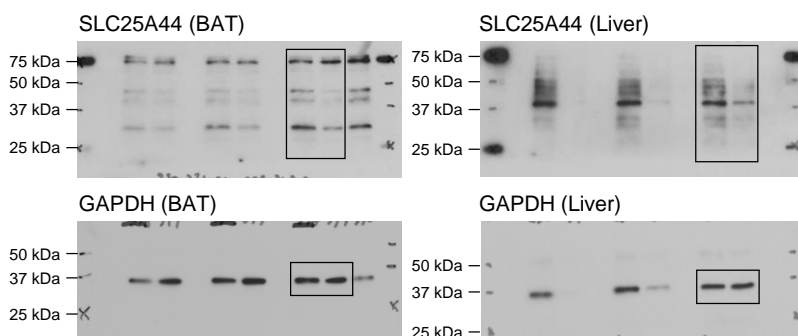

Ext Data Fig 6f

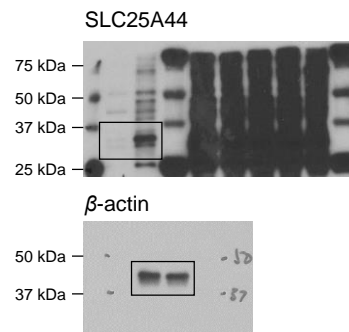

Ext Data Fig 6g

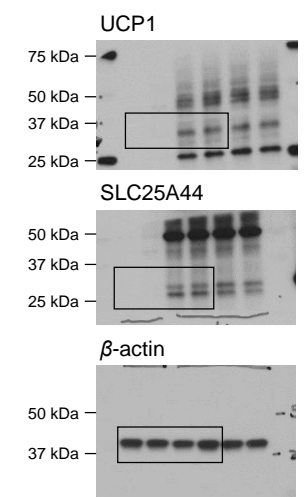

Supplementary Figure 1. Uncropped scans with size marker indications

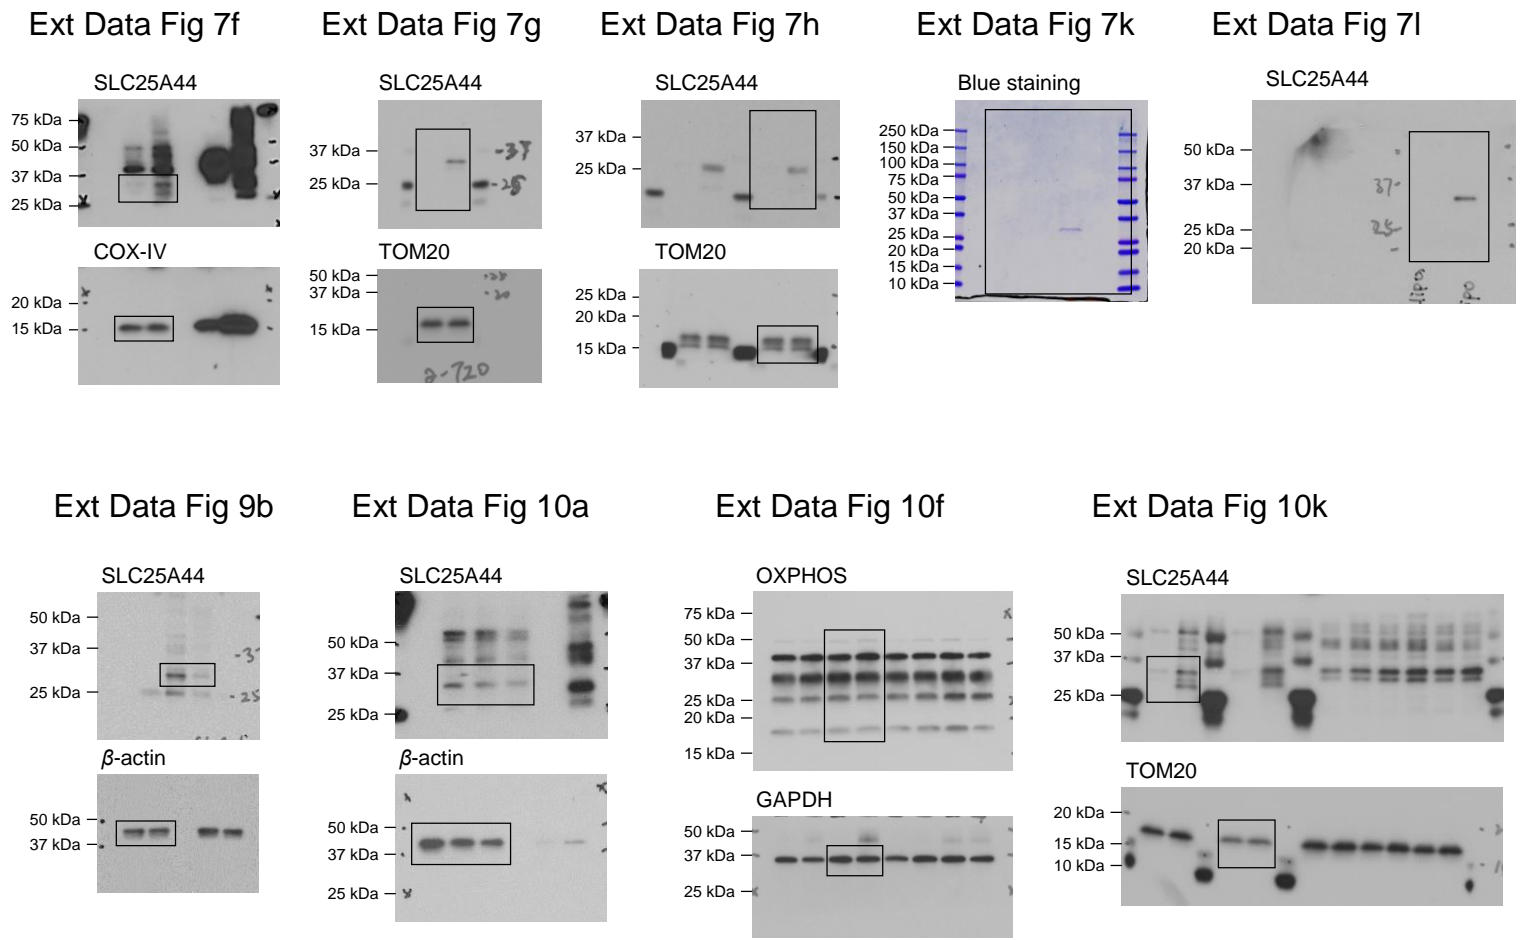

Supplement: NIHMS1535499-supplement-2.pdf [file NIHMS1535499-supplement-2.pdf]
