# Supplementary material
Source: PubMed Central journal article supplement (PMC6715529)
Supplement: NIHMS1535499-supplement-3.pdf [file NIHMS1535499-supplement-3.pdf]

Supplemental Table1. Subject profiles

|                                          | All         | High BAT    | Low BAT     | <i>P</i> value |
|------------------------------------------|-------------|-------------|-------------|----------------|
| Number                                   | 33          | 17          | 16          | -              |
| Age (years)                              | 23.4±0.58   | 22.4±0.24   | 24.4±1.14   | 0.09           |
| Hight (cm)                               | 171.0±0.92  | 171.4±1.51  | 170.5±1.07  | 0.64           |
| Weight (kg)                              | 61.5±1.19   | 61.6±1.74   | 61.3±1.69   | 0.89           |
| BMI (kg/m <sup>2</sup> )                 | 21.0±0.30   | 20.9±0.40   | 21.0±0.47   | 0.85           |
| Body fat content (%)                     | 17.2±0.83   | 16.5±1.10   | 18.0±1.26   | 0.38           |
| Waist circumference (cm)                 | 76.4±1.02   | 76.2±1.48   | 76.6±1.45   | 0.86           |
| Abdominal fat area (cm <sup>2</sup> )    | 124.4±10.24 | 121.2±16.89 | 127.8±11.68 | 0.75           |
| Visceral fat area (cm <sup>2</sup> )     | 36.7±2.72   | 38.5±4.38   | 34.9±3.21   | 0.52           |
| Subcutaneous fat area (cm <sup>2</sup> ) | 87.7±8.56   | 82.8±14.17  | 93.0±9.58   | 0.56           |
| Glucose (mg dl <sup>-1</sup> )           | 80.8±1.09   | 81.3±1.43   | 80.3±1.70   | 0.64           |
| Insulin (mU l <sup>-1</sup> )            | 4.3±0.38    | 4.7±0.61    | 3.9±0.42    | 0.27           |
| HOMA-IR                                  | 0.87±0.082  | 0.96±0.134  | 0.77±0.090  | 0.26           |

Values are means ± SEMs. Two-sided *P* values were given by using unpaired Student's *t*-test.

There were no significant differences between the high- and low-BAT groups.

BAT, brown adipose tissue. BMI, body mass index. HOMA-IR: homeostatic model assessment for insulin resistance.
