# Supplementary material
Source: PubMed Central journal article supplement (PMC6715529)
Supplement: NIHMS1535499-supplement-4.pdf [file NIHMS1535499-supplement-4.pdf]

Supplemental Table2. Changes in circulating amino acid levels by cold exposure

|            | All         |             | High BAT    |             | Low BAT     |             | P-value |       |             |
|------------|-------------|-------------|-------------|-------------|-------------|-------------|---------|-------|-------------|
|            | 27C         | 19C         | 27C         | 19C         | 27C         | 19C         | Cold    | BAT   | Interaction |
| Val (μM)   | 221.9±4.54  | 219.5±3.77  | 233.8±6.19  | 224.6±5.68  | 209.3±5.17  | 214.1±4.72  | 0.19    | 0.10  | 0.003       |
| Leu (μM)   | 129.0±2.18  | 132.8±2.07  | 132.8±2.93  | 133.5±2.42  | 125.1±3.01  | 132.0±3.47  | 0.006   | 0.26  | 0.02        |
| Ile (μM)   | 65.8±1.86   | 66.0±1.49   | 70.3±2.59   | 68.6±1.92   | 61.1±2.18   | 63.2±2.16   | 0.95    | 0.06  | 0.12        |
| BCAAs (μM) | 416.8±7.55  | 418.3±6.29  | 436.9±10.14 | 426.6±8.60  | 395.5±8.71  | 409.4±8.95  | 0.57    | 0.026 | 0.001       |
| Arg (μM)   | 86.2±2.31   | 90.6±3.75   | 86.1±3.29   | 93.0±6.35   | 86.3±3.36   | 88.0±3.92   | 0.11    | 0.69  | 0.32        |
| Ala (μM)   | 353.8±10.43 | 348.0±11.36 | 367.7±16.70 | 359.5±18.19 | 339.0±11.58 | 335.8±13.15 | 0.15    | 0.23  | 0.52        |
| Pro (μM)   | 173.6±8.14  | 169.3±7.87  | 176.7±9.57  | 170.5±9.59  | 170.3±13.66 | 168.1±12.97 | 0.014   | 0.79  | 0.23        |
| Gly (μM)   | 240.6±5.43  | 241.1±4.46  | 230.4±6.36  | 232.9±5.66  | 251.4±8.29  | 249.8±6.42  | 0.83    | 0.05  | 0.31        |
| Met (μM)   | 26.4±0.51   | 27.6±0.70   | 27.3±0.81   | 28.5±1.08   | 25.3±0.52   | 26.6±0.83   | 0.005   | 0.09  | 0.95        |
| Phe (μM)   | 57.3±0.97   | 57.1±0.96   | 56.5±1.00   | 56.3±1.38   | 58.1±1.71   | 57.8±1.34   | 0.73    | 0.41  | 0.93        |
| Asn (μM)   | 50.7±1.11   | 51.2±1.10   | 50.6±1.60   | 51.3±1.58   | 50.9±1.58   | 51.2±1.59   | 0.31    | 0.95  | 0.65        |
| Asp (μM)   | 11.8±0.96   | 10.3±1.00   | 10.1±1.70   | 9.5±1.84    | 13.5±0.73   | 11.0±0.95   | 0.001   | 0.36  | 0.49        |
| Thr (μM)   | 129.3±2.49  | 127.0±2.34  | 129.0±3.05  | 125.2±3.24  | 129.7±4.10  | 128.9±3.43  | 0.13    | 0.64  | 0.34        |
| Ser (μM)   | 133.8±2.59  | 132.6±3.03  | 130.5±3.51  | 131.0±4.48  | 137.2±3.75  | 134.3±4.15  | 0.37    | 0.37  | 0.23        |
| Glu (μM)   | 50.1±2.66   | 39.5±2.00   | 45.9±3.88   | 39.8±3.48   | 54.5±3.39   | 39.3±1.96   | 0.000   | 0.35  | 0.02        |
| Gln (μM)   | 592.4±8.71  | 630.2±8.44  | 583.4±12.59 | 619.4±12.72 | 601.9±11.93 | 641.7±1065  | 0.000   | 0.21  | 0.77        |
| Cys (μM)   | 9.2±0.55    | 7.9±0.56    | 9.3±0.70    | 7.6±0.52    | 9.0±0.89    | 8.2±1.04    | 0.09    | 0.87  | 0.50        |
| Tyr (μM)   | 53.5±1.00   | 51.1±0.95   | 55.4±1.62   | 53.5±1.45   | 51.5±0.94   | 48.5±0.88   | 0.000   | 0.02  | 0.32        |
| His (μM)   | 79.6±1.11   | 80.8±1.45   | 78.2±1.32   | 79.2±1.90   | 81.1±1.78   | 82.4±2.18   | 0.20    | 0.22  | 0.87        |
| Trp (μM)   | 60.6±1.42   | 58.9±1.59   | 61.5±2.19   | 58.7±2.48   | 59.7±1.81   | 59.2±2.04   | 0.21    | 0.83  | 0.38        |
| Lys (μM)   | 171.9±3.30  | 181.5±3.15  | 173.6±4.75  | 184.0±4.26  | 170.0±4.69  | 178.8±4.70  | 0.000   | 0.49  | 0.57        |

*n* = 29 (Asp), *n* = 33 (other amino acids)

Values are means ± SEMs. Statistical analysis was performed by using two-way repeated measures ANOVA.

The significant interaction of cold x BAT was found for Val, Leu, total BCAAs, and Glu, implying that these amino acid levels respond to cold exposure in a BAT-dependent manner.

BAT, brown adipose tissue.
