# Supplementary material
Source: PubMed Central journal article supplement (PMC6715529)
Supplement: NIHMS1535499-supplement-6.pdf [file NIHMS1535499-supplement-6.pdf]

Supplementary Table 4. Sequences of qPCR primers

|             | Gene                  | Forward primer            | Reverse primer             |
|-------------|-----------------------|---------------------------|----------------------------|
| Mouse       | <i>Ucp1</i>           | CACCTTCCCCGCTGGACACT      | CCCTAGGACACCTTTATACCTAATGG |
|             | <i>Pgc1a</i>          | AGCCGTGACCACTGACAACGA     | GCTGCATGGTTCTGAGTGCT       |
|             | <i>Pparg</i>          | TGAAAGAAGCGGTGAACCACTG    | TGGCATCTCTGTGTCAACCATG     |
|             | <i>Cidea</i>          | ATCACAACTGGCCTGGTTACG     | TACTACCCGGTGTCCATTCT       |
|             | <i>Adipoq</i>         | GCACTGGCAAGTTCTACTGCAA    | GTAGGTGAAGAGAACGGCCTTGT    |
|             | <i>Fabp4</i>          | ACACCGAGATTCCTTCAAACCTG   | CCATCTAGGGTTATGATGCTC      |
|             | <i>Pref1</i>          | CTGACAATGTCTGCAGGTGC      | CAGATGCACTGCCATGGTTC       |
|             | <i>Pdgfra</i>         | TCCATGCTAGACTCAGAAGTCA    | TCCCGGTGGACACAATTTTTTC     |
|             | <i>Cox1</i>           | TAGCCCATGCAGGAGCATCA      | TGGCTGGGGGTTTCATGTTGA      |
|             | <i>Cox2</i>           | ACCTGGTGAACCTACGACTGCT    | CCTAGGGAGGGGACTGCTCA       |
|             | <i>Cox3</i>           | CTTCACCATCCTCCAAGCTTCA    | AGTCCATGGAATCCAGTAGCCAT    |
|             | <i>Cox4i1</i>         | GCCTGATTGGCAAGAGAGCC      | CAAGGGGTAGTCACGCCGAT       |
|             | <i>Cox7a</i>          | CAGCGTCATGGTCAGTCTGT      | AGAAAACCGTGTGGCAGAGA       |
|             | <i>Cox8b</i>          | GAACCATGAAGCCAACGACT      | GCGAAGTTCACAGTGGTTCC       |
|             | <i>Atp6</i>           | TGGCATTAGCAGTCCGGCTT      | ATGGTAGCTGTTGGTGGGCT       |
|             | <i>Atp8</i>           | TTCCCACTGGCACCTTCACC      | TGTTGGGGTAATGAATGAGGCAA    |
|             | <i>Bcat2</i>          | TTCCAGAACCTCACGCTACAC     | TAGCAGAACGTAGCATCCTGTC     |
|             | <i>Bckdha</i>         | AGGAGGTGCTGAAGTTCTACC     | CGCCATAGTTGGTCATGTAGAAG    |
|             | <i>Bckdhb</i>         | GCCAAAGACCCCACTGCAGTAA    | GGATTTCCGCAATAGCTGTAGCACC  |
|             | <i>Dld</i>            | GCAGATCAACCAATTGAGGCTGACG | GCATGTTCCACCTAGTGTCTC      |
|             | <i>Dbt</i>            | CCAACATTGGATCAATCGGTGG    | CTGTGATCCGCTGACCAGCTCAC    |
|             | <i>Ppm1k</i>          | GCAGCTCATTCGGTGACTION     | CCACTGGAGGCAAAGCTTCT       |
|             | <i>Glut1</i>          | TCAACACGGCCTTCACTG        | CACGATGCTCAGATAGGACATC     |
|             | <i>Glut4</i>          | GTAACCTCATTGTCGGCATGG     | AGCTGAGATCTGGTCAAACG       |
|             | <i>HK2</i>            | TGATCGCCTGCTTATTCACGG     | AACCGCCTAGAAATCTCCAGA      |
|             | <i>Pdha1</i>          | AACTTCTATGGAGGCAACGG      | CTGACCCTGATTAGCAGCAC       |
|             | <i>CD36</i>           | TGCATTGCCAATGTCTAGC       | CCCTCCAGAATCCAGACAAC       |
|             | <i>Cpt1</i>           | AAGGAATGCAGGTCCACATC      | CCAGGCTACAGTGGGACATT       |
|             | <i>Cpt2</i>           | GGCCACCAACTGACTGTTT       | GAAGGAACAAAGCGGATGAG       |
|             | <i>Vlcad</i>          | TATCTCTGCCAGCGACTTT       | TGGGTATGGGAACACCTGAT       |
|             | <i>Srebp1c</i>        | TCTGCCTTGATGAAGTGTGG      | AGCAGCCCCTAGAACAACA        |
|             | <i>Acc</i>            | AATGAACGTGCAATCCCATTG     | ACTCCACATTTGCGTAATTGTTG    |
| <i>Fasn</i> | GAGGTGGTGATAGCCGGTAT  | TGGGTAATCCATAGAGCCCAG     |                            |
| <i>Scd1</i> | AGGCCTGTACGGGATCATACT | AGAGCGCTGGTCATGTAGTAG     |                            |

(continued)

(continued)

|       | Gene            | Forward primer        | Reverse primer        |
|-------|-----------------|-----------------------|-----------------------|
| Mouse | <i>Slc25a2</i>  | GAGGAACATGAAGTCCACCC  | CAAGGCCTTTGTACAGCTGA  |
|       | <i>Slc25a12</i> | CAGCTCTTGGCAGGAGTAGC  | GTCACCTCTCCATTTCCGCTC |
|       | <i>Slc25a13</i> | TCCAACCAGAGAGCAGGTCT  | TTAAGCTCAGCTGGATCGGC  |
|       | <i>Slc25a15</i> | AGCAGGTGGTCCGTAAAGTG  | GCATTTACAAGCTCCGTGG   |
|       | <i>Slc25a18</i> | CGACTACAGAACCAGCAGGG  | ACCAGGGTGAGGTTTACTGC  |
|       | <i>Slc25a20</i> | GTGCTCACACTCATGCGAGA  | CGCTGAGGTCACTGACACTC  |
|       | <i>Slc25a22</i> | CATCGCTGGGCTAATCGGG   | GCTCCCCTATACATGCCGAAG |
|       | <i>Slc25a26</i> | TGTGGTGGATTCTTGGCAGT  | GTCTTAGCCACGTCCAGAGG  |
|       | <i>Slc25a29</i> | CTCGACTTCCTGGCTGGATG  | TGATGGACTGGAAGCAGTGC  |
|       | <i>Slc25a38</i> | CGTCCCCAGTGATCGAGAAG  | GGAAGAGGAGCGTGGAACAG  |
|       | <i>Slc25a39</i> | CTCGGCAACCAGCGAATTG   | CCATTGCAGTATAGGAGGCAC |
|       | <i>Slc25a40</i> | TTCACCTCGTGGTCGACATC  | GAGTGCTTGCCTAACATGCC  |
|       | <i>Slc25a44</i> | TCGCTGCTAACGTACATCCC  | AGACAATGTGAGGGCACTCC  |
|       | <i>Slc25a45</i> | TTTGTGGCTGGCTGGATCTC  | AGGACTGACTCATGGCGGTA  |
|       | <i>Slc25a47</i> | TGGGCTACCCTCTGGATACA  | CACACCCGCTCTTGACGATA  |
|       | <i>Slc25a48</i> | AGCAACTCCAATGGATGTCGT | CGCACAGCATTACAGTGAT   |
|       | <i>Gfp</i>      | AGCTGAAGGGCATCGACTTC  | AGCAGGACCATGTGATCGC   |
|       | <i>36B4</i>     | GGCCCTGCACTCTCGCTTTC  | TGCCAGGACGCGCTTGT     |
| Human | <i>UCP1</i>     | GTGTGCCCAACTGTGCAATG  | CCAGGATCCAAGTCGCAAGA  |
|       | <i>BCKDHA</i>   | GGTGTGCTGATGTATCGGGAC | CTTGCAGCCGTAGTGGACA   |
|       | <i>SLC25A39</i> | TCGTGAAGATCGTGAGGCAC  | GGCTCGACCACACAGGAAG   |
|       | <i>SLC25A44</i> | GGCTATGTGGCTTCACTGCT  | AGGGCACTCCTTAGGACACA  |
|       | <i>TBP</i>      | CACGAACCACGGCACTGATT  | TTTTCTTGCTGCCAGTCTGGA |
